# Supplementary material for: Long-Term Supranutritional Supplementation with Selenate Decreases Hyperglycemia and Promotes Fatty Liver Degeneration by Inducing Hyperinsulinemia in Diabetic db/db Mice
Source: PLoS One. 2014 Jul 1;9(7):e101315. doi: 10.1371/journal.pone.0101315 (PMC4077766; doi:10.1371/journal.pone.0101315)
Supplement: Table S1 — Expression information of all the differential genes with a change factor of ≥ 1.5 in pancreas. (XLS) [file pone.0101315.s001.xls]

## Sheet: Sheet1
		Gene Symbol	Probe Set ID	Q-value(%)	Fold Change (DMSe/DMCtrl)	Signal Strength (DMSe)			Signal Strength (DMCtrl)
						DMSe-rep1	DMSe-rep2	DMSe-rep3	DMCtrl-rep1	DMCtrl-rep2	DMCtrl-rep3
	Selenate-upregulated Genes	Gm10408	XM_001477400	2.9125	4.9933	514.842	479.492	495.789	59.3503	82.7487	200.167
		Defb1	BC024380	2.19178	4.8507	673.884	705.655	553.504	137.743	216.718	77.2537
		Gm4293	XM_001480394	4.12308	3.7221	730.487	851.18	785.703	110.038	274.233	313.954
		Ucn3	BC119433	2.00488	3.6642	1127.81	1107.52	1134.39	408.762	339.4	207.597
		Vil1	BC015267	2.00488	3.4388	669.995	483.569	693.357	135.161	192.43	212.4
		Abcg8	AY196216	4.82775	3.4315	689.392	611.852	473.292	111.267	312.397	142.142
		Amy2b	XM_001481336	2.19178	3.4281	9625.44	11206.2	11135.3	2434.86	4988.38	2454.64
		Spc25	BC033605	0	3.2359	538.209	562.236	660.109	217.292	188.009	144.301
		Smug1	AK045411	2.00488	3.2212	975.379	847.419	647.409	237.559	337.469	199.706
		Scgn	BC016093	2.00488	2.8836	2037.3	1491.4	2160.76	564.35	762.973	635.892
		Pappa2	NM_001085376	2.19178	2.8761	2101.65	1419.04	2284.65	802.372	633.816	563.132
		G6pc2	BC141558	0	2.8748	4494.19	3945.33	4084.39	1452.1	1596.34	1314.92
		Pax6	BC069912	2.00488	2.7993	668.091	539.365	547.822	163.593	232.853	236.24
		Ins2	AY899305	2.00488	2.7486	6621.42	7146.35	7519.12	3332.67	2602.5	1975.51
		G6pc2	BC111905	0	2.7467	9451.76	8267.39	7839.79	3403.41	3312.61	2622.23
		Ins1	BC098468	2.00488	2.6096	28336.8	35471.1	28622.5	12625.1	12738.7	10065.3
		Aldh1a3	BC058277	2.00488	2.5886	1257.49	1010.55	1140.17	452.997	539.196	341.983
		2900052N01Rik	AK049847	2.19178	2.513	1486.95	1176.77	1006.85	530.344	394.855	530.117
		Spc25	AK151554	2.00488	2.511	1866.75	2420.09	2469.71	1060.41	841.44	789.811
		Ank1	AK158131	2.00488	2.3658	869.285	1139.85	1096.94	496.331	386.712	427.638
		Bace2	BC120773	4.12308	2.3605	1592.41	1194.82	1255.28	741.058	578.054	423.917
		Cxx1a	BC003436	2.19178	2.359	678.188	683.863	778.875	276.068	251.374	396.515
		Arhgef4	AK031310	4.82775	2.2648	657.564	657.183	973.679	371.143	249.713	390.834
		Pax6	AF443223	4.12308	2.1908	820.684	533.91	621.144	243.117	359.352	296.282
		Mum1l1	BC068178	3.66851	2.1822	1495.06	1236.91	1295.95	466.917	650.62	759.123
		Pde5a	BC119137	0	2.1713	541.309	460.689	558.79	244.193	233.077	239.188
		Tgfb1i1	DQ143894	2.9125	2.1699	465.991	502.385	445.995	168.28	260.176	233.417
		Aldh1a3	AK086764	2.00488	2.154	754.807	799.49	857.714	451.753	343.526	333.731
		Fhad1	AK148490	2.19178	2.1528	1266.91	939.799	1142.5	458.835	583.279	509.44
		Isl1	BC132263	2.00488	2.1226	820.769	867.382	739.99	340.723	365.791	442.014
		Emilin2	BC053753	3.66851	2.1157	1247	1157.89	1597.57	593.799	541.393	757.655
		Ece2	NM_177940	2.19178	2.1031	511.459	615.967	437.401	252.685	261.964	223.8
		Ccdc68	BC046343	4.59315	2.0971	2209.55	1952.4	1661.02	702.259	971.109	1139.2
		Adamtsl1	AK132420	2.00488	2.0459	492.559	484.769	515.846	286.128	237.21	211.908
		Gm266	BC145736	3.66851	2.0276	572.96	402.339	563.382	226.523	287.258	239.428
		Ddc	BC060989	4.12308	2.0093	2658.66	1886.95	3002.9	1270.04	1180.28	1238.95
		Gpr177	AK159977	2.9125	1.9981	566.74	540.335	604.666	315.603	320.962	229.165
		Hes5	BC099865	0	1.9947	863.859	828.047	743.549	400.061	418.072	400.69
		Abcc8	BC057080	4.82775	1.9846	1405.6	893.871	1203.07	627.209	618.834	498.226
		Pdzd4	BC056462	2.00488	1.9749	793.842	908.141	736.071	392.023	380.722	461.578
		Gm2137	XM_001472609	2.00488	1.9695	1156.95	1085.73	1080.61	583.656	486.517	625.755
		3830406C13Rik	BC027421	2.19178	1.9429	492.717	550.863	464.776	292.337	258.656	227.478
		Btbd11	BC059036	4.59315	1.9352	660.066	617.693	517.828	341.471	242.426	351.904
		Aldh1a3	AF246711	2.73682	1.9181	471.761	403.26	428.11	206.78	268.706	207.697
		AA467197	AK141297	2.9125	1.9109	548.164	514.126	577.482	321.957	307.24	235.78
		Slc2a5	BC023500	2.00488	1.9019	1289.84	1212.89	1275.88	617.815	613.745	765.201
		Sephs1	AK053638	4.12308	1.8941	690.061	565.416	664.734	357.774	274.256	389.011
		Ifi27l2b	BC021795	2.9125	1.8654	911.817	757.125	944.061	507.59	491.049	402.822
		Neurod1	BC018241	3.31577	1.8252	1427.42	1247.37	1158.41	605.436	717.24	781.207
		Gm1568	BC067044	2.00488	1.8249	569.999	540.294	491.742	276.443	280.411	321.475
		A330050F15Rik	XM_897425	2.00488	1.8189	1060.29	1073.95	959.717	535.769	534.613	634.078
		Gtpbp6	AK152972	2.9125	1.8136	800.033	725.916	613.758	425.795	390.286	359.56
		Rps6ka6	AK012150	4.12308	1.8122	731.675	634.866	768.004	433.935	324.765	425.369
		Sec16b	AK173302	4.12308	1.8077	929.932	955.284	996.729	477.906	662.455	473.458
		Tmem27	BC049912	4.12308	1.796	5409.08	4214.12	6020.9	2893.34	2934.96	2789.67
		Baiap3	AK122358	2.9125	1.7717	586.43	534.984	660.683	334.237	303.289	367.668
		Klhdc8b	AK154428	3.66851	1.7629	1041.48	925.23	764.472	547.484	491.1	500.073
		Hmgb3	BC011276	2.19178	1.7614	2183.25	2700.96	2658.94	1369.26	1474.59	1420.94
		Ddc	BC152724	4.12308	1.7604	2636.84	2166.18	2891.01	1419.94	1317.02	1618.61
		Zfp108	BC100339	4.12308	1.7378	585.929	551.097	549.621	302.619	388.039	287.991
		Zfp563	BC148480	2.00488	1.6686	862.257	860.636	816.723	478.151	498.269	547.544
		Dclk2	AK049179	2.00488	1.6634	1002.41	1113.93	1083.65	637.412	611.903	674.077
		Rprm	BC030065	2.19178	1.6463	4049.34	3836.08	3835.55	2181.83	2408.61	2540.92
		Zfp119	BC118950	3.66851	1.6383	979.734	843.8	883.243	501.193	545.2	607.647
		Tbc1d7	AK156543	4.12308	1.6324	1527.11	1779.16	1434.05	917.229	938.647	1040.38
		Zfp444	BC023396	4.12308	1.6318	568.453	504.958	452.386	290.782	315.018	326.282
		Fam183b	BC061254	3.66851	1.6237	2888.21	2549.29	3144.96	1732.93	1864.67	1674.04
		Tinagl1	BC005738	4.12308	1.6103	594.03	570.646	697.784	412.231	372.632	368.784
		Bex4	BC090663	2.00488	1.6081	2617.35	2642.72	2800.12	1717.21	1687.97	1606.74
		Ccdc75	BC092522	2.00488	1.597	541.414	601.414	550.352	340.465	354.291	364.745
		5730419I09Rik	AK029825	2.19178	1.5908	546.107	509.132	474.416	310.056	314.627	335.867
		Cand1	XM_125901	3.66851	1.5768	771.77	732.471	639.583	427.199	460.844	468.432
		1500010J02Rik	AK038651	4.59315	1.5736	925.291	952.119	855.816	603.028	629.905	509.428
		Rin1	BC011277	2.73682	1.5535	1977.71	2220.23	1953.13	1345.65	1303.88	1303.74
		Cdc27	BC023187	2.19178	1.5476	2137.96	1940.37	1955.65	1324.86	1248.48	1323.21
		Eme2	BC092228	3.66851	1.5338	1637.72	1667.71	1757.99	1085.44	1017.19	1205.25
		Mgat4a	AK052278	4.12308	1.5219	618.285	579.334	660.462	399.48	384.413	437.017
		Acvr1c	AK142396	3.66851	1.5206	708.761	720.007	712.54	512.274	429.394	470.14
		D7Ertd715e	AK035645	3.66851	1.5164	870.875	949.067	1004.75	592.625	617.196	651.133
		Scg3	AK158315	4.12308	1.5152	11730.7	10918.1	12994.4	7805.81	7542.98	8125.57
		Ntng1	AK034465	4.59315	1.5046	583.538	675.727	642.669	407.647	399.651	456.626
		Arl6	BC018497	2.19178	1.4763	3074.05	3159.08	3085.16	2028.3	2085.74	2200.97
		Tpcn1	AK129303	2.73682	1.4697	916.572	874.709	854.215	609.577	576.975	613.433
		Alg8	BC061244	3.31577	1.464	539.505	568.654	588.618	404.274	379.04	375.6
		Scly	AK188684	4.45913	1.4322	662.209	584.676	633.134	422.9	438.994	449.463
		Sfrs5	AK005552	4.59315	1.4222	2689.42	2622.12	2608.9	1963.32	1895.04	1719.13
		Efemp2	AK075585	4.59315	1.4071	1319.79	1207.19	1193.42	860.632	916.951	864.806
		A930015D03Rik	BC055918	4.12308	1.3787	1133.75	1175.38	1121.81	790.057	853.477	845.992
		Dip2c	AK173066	3.31577	1.3758	754.541	788.174	774.998	548.628	570.428	565.553
	Selenate-downregulated Genes	Farp2	BC009153	3.36757	0.6803	711.392	722.819	732.588	1068.49	1105.72	1012.65
		Fbp2	BC012720	4.51576	0.6691	1497.78	1393.12	1365.12	2008.34	2158.28	2193.44
		Taf7	BC029673	3.67969	0.6311	1169.95	1346.13	1187.91	1975.3	1997.64	1886.59
		Lamb3	AK155769	3.67969	0.5967	3760.16	3771.87	4365.98	7204.84	6548.02	6178.2
		Sfmbt1	BC018217	2.05262	0.5872	629.879	540.399	592.702	979.495	1026.13	991.453
		2410024N18Rik	AK010587	3.67969	0.568	2082.88	1892.83	1950.95	3711.99	3008.23	3759.34
		Gadd45b	BC023815	4.22598	0.5665	4736.15	5465.11	6117.22	8872.71	9889.88	9925.79
		Maff	BC022952	4.22598	0.5442	1140.68	1230.61	1481.07	2231.32	2213.28	2612.67
		Acot1	BC028261	3.67969	0.5355	9213.56	9564.54	11822.7	19543.9	20073.5	17292.5
		Elovl2	BC098215	0	0.5319	420.016	443.436	494.491	894.624	807.023	847.875
		Jun	BC021888	2.05262	0.5267	1915.34	1777.62	1625.07	3174.81	3273	3643.6
		2410024N18Rik	AK042145	3.67969	0.5208	2417.58	2317.87	2190.6	5345.82	3797.52	4281.5
		Ppcdc	BC052928	0	0.5173	4736.12	4477.8	4538.91	8994.51	8343.4	9266.8
		Fosl2	BC065131	2.82655	0.5166	766.696	767.497	790.981	1465.97	1312.24	1755.02
		Ppcdc	BC089351	4.51576	0.5083	1905.21	1937.24	2338.07	4231.6	3370.28	4608.33
		Btg2	BC132259	3.36757	0.4612	1976.67	2153.38	1727	3956.89	5132.7	3689.78
		Pcdh8	BC053008	3.36757	0.4214	1344.53	1915.62	1287.83	3046.51	3923.44	3707.6
		Gm13889	XM_885087	2.48682	0.4109	731.978	699.134	622.733	1336.89	2027.93	1694.47
		Apold1	NM_001109914	4.22598	0.3831	860.287	1230.15	1448.23	2701.81	2685.17	3756.92
		Gltscr2	AK079167	3.36757	0.383	304.284	317.784	331.554	638.42	1123.01	795.881
		Tbc1d1	AK080526	0	0.3752	316.503	337.271	301.164	854.186	788.493	903.99
		Junb	BC003790	2.05262	0.3309	1482.81	2326.98	1952.67	4948.43	5474.84	6865.44
		Arc	BC023127	3.36757	0.3089	830.145	1469.5	776.489	2758.2	3060.29	3805.7
		Arl4d	XM_001471772	3.36757	0.3039	1231.03	1011.69	777.49	2415.84	3283.18	4349.08
		N/A	AK038627	0	0.2975	637.622	756.49	908.265	2510.83	2883.2	2298.22
		Junb	BC092302	0	0.2786	1480.2	2483.3	1883.95	6441.78	6205.75	8010.91
		Nr4a1	BC004770	0	0.2636	874.051	1011.57	841.176	3150.78	2961.36	4349.46
		1700016P03Rik	AK006051	0	0.2591	572.916	659.302	838.705	2065.85	2965.64	2973.33
		Fos	BC029814	2.48682	0.1624	641.418	1972.6	1376.55	7257.48	6562.49	8537.36
		Cyr61	BC066019	0	0.1452	325.723	716.078	510.253	3688.88	2596.94	4061.62
		Arl4d	BC016113	0	0.1245	274.092	338.402	255.329	1538.73	2586.91	3082.52
		Egr2	BC009093	0	0.0991	90.2905	177.393	78.9778	797.147	997.3	1633.65
		Egr4	BC141509	0	0.0991	98.3887	154.104	78.3129	834.28	1116.54	1310.77
		Fosb	BC132064	0	0.0511	66.1584	42.4155	36.4618	665.586	1037.29	1111.68
		Npas4	BC129861	0	0.0508	70.4022	154.191	84.5077	1765.45	1614.2	2456.81
		Nr4a3	BC038520	0	0.0399	33.7373	44.3467	125.361	923.122	1929.16	1661.62
